# Supplementary material for: Morphologic Features of Crystalline Lens in Patients with Primary Angle Closure Disease Observed by CASIA 2 Optical Coherence Tomography
Source: PubMed Central journal article supplement — Invest Ophthalmol Vis Sci. 2020 May 22;61(5):40. doi: 10.1167/iovs.61.5.40 (PMC7405781; doi:10.1167/iovs.61.5.40), 2020-05-22
Supplement: iovs-61-5-40_s002.pdf [file iovs-61-5-40_s002.pdf]

**Supplementary Table 2.** Multivariate Regression for Lens Parameters with Adjustment for Lens Vault.

| Variable        | Crude Model          |                |                    | Multivariate-Adjusted Model 1 |                |                    | Multivariate-Adjusted Model 2 |                |                    |
|-----------------|----------------------|----------------|--------------------|-------------------------------|----------------|--------------------|-------------------------------|----------------|--------------------|
|                 | $\beta$ (95%CI)      | <i>P</i> value | <i>P</i> for Trend | $\beta$ (95%CI)               | <i>P</i> value | <i>P</i> for Trend | $\beta$ (95%CI)               | <i>P</i> value | <i>P</i> for Trend |
| <b>Front Rs</b> |                      |                |                    |                               |                |                    |                               |                |                    |
| Normal          | Ref                  |                | <0.0001            | Ref                           |                | <0.0001            | Ref                           |                | 0.05               |
| PACS            | -0.83 (-1.14, -0.52) | <0.0001        |                    | -0.91 (-1.23, -0.59)          | <0.0001        |                    | -0.30 (-0.61, -0.00)          | 0.05           |                    |
| PAC/PACG        | -1.09 (-1.46, -0.73) | <0.0001        |                    | -1.19 (-1.57, -0.82)          | <0.0001        |                    | 0.38 (-0.75, -0.01)           | 0.04           |                    |
| <b>Front Rf</b> |                      |                |                    |                               |                |                    |                               |                |                    |
| Normal          | Ref                  |                | <0.0001            | Ref                           |                | <0.0001            | Ref                           |                | 0.014              |
| PACS            | -1.07 (-1.46, -0.67) | <0.0001        |                    | -1.17 (-1.58, -0.77)          | <0.0001        |                    | -0.57 (-0.99, -0.15)          | 0.009          |                    |
| PAC/PACG        | -1.36 (-1.83, -0.90) | <0.0001        |                    | -1.49 (-1.97, -1.02)          | <0.0001        |                    | -0.68 (-1.19, -0.17)          | 0.01           |                    |
| <b>Front R</b>  |                      |                |                    |                               |                |                    |                               |                |                    |
| Normal          | Ref                  |                | <0.0001            | Ref                           |                | <0.0001            | Ref                           |                | 0.016              |
| PACS            | -0.95 (-1.28, -0.61) | <0.0001        |                    | -1.04 (-1.38, -0.70)          | <0.0001        |                    | 0.44 (-0.77, -0.10)           | 0.011          |                    |
| PAC/PACG        | -1.23 (-1.62, -0.84) | <0.0001        |                    | -1.34 (-1.74, -0.94)          | <0.0001        |                    | -0.53 (-0.94, -0.12)          | 0.012          |                    |

Crude Model, adjustment for stage of PACD, Model 1, further adjustment for age and gender; Model 2, further adjustment for lens vault.
